# Supplementary material for: Structural and Evolutionary Adaptation of NOD‐Like Receptors in Birds
Source: Hindawi journal article supplement (doi:10.1155/2021/5546170), 2021-01-01
Supplement: f1 [file 5546170.f1.zip]

## Primers

| Target gene (bp) | Forward primer (5'-3') | Reverse primer (5'-3') |
|------------------|------------------------|------------------------|
| NOD1             | CCTCCTCCCGTCCGTCC      | TCAGAAGCAAATGATCCG     |
| NLRC3(1~936)     | ATGGAAGAGGCTTGGATCAG   | CTCCGTCATGCGGTCTAC     |
| NLRC3(676~1507)  | CCCCACATCACGGAACCCAAC  | GATCGAATATCGCCCGCTTG   |
| NLRC3(1433~2482) | ATTTCTCCCACTTAACCATAC  | CCGAGCCGTTGTCTCTCTAC   |
| NLRC3(2216~3276) | GCCCATCGGGAGCGAAAGC    | TCACACCACCACCACGCAG    |
| NLRP3(1~1024)    | ATGGCAGGAGAAGAAAGCACC  | AGGCCACATCTGCTTTACTG   |
| NLRP3(676~1782)  | TGCCCTCAACAGCGAATGC    | GAAACTGCCCAACACGCTC    |
| NLRP3(1423~2202) | CTCTTCGCAGCGATGTTTTAC  | TCACCGCAGGACACGCAGC    |

### >NOD1-chicken

MEGHLKANLKTSVEKPLTTSPPSICIALLKVYRELLVSKIRHTQCLIDNLINNEYFSTEDAEIVVQFPTQ  
ADKVRKILDLVQSKGEEVSEYFICVLQKVTDAYYELQPWLDEIGYQPSENICSKPVVNTDPVSRYCQKL  
RYELGRDSKFLVLSYAQREEMLEEIYSNSIMEMVNFTNESLGEVCQLQALFDDAVGVINEDGETIYVFG  
DAGIGKSILLQKIQSLWAKKQLDIGAKFFHFRCRMFSCFKEDEAVCLKDLLFRYNCYPDQDPTEVFHH  
ILQFPHTVLFTFDGFDEIYSNFDLSSVPEMCSPDEPMHPLVLLVSLLRGKLLKGSKKILTARTGTEIQR  
NIIRKKVLLRGFSNSNLKEYTAMFFKDVGQRTLVLNLQLEANPNLCSLCSVPLFCWIIFKCYEHFHSMTD  
SHELDPDCSVTLTDVFLLMIEVHLNRSLKTSLLKNNTRSQAQEVFRSRKETLLALGKIAIRGMGNSIFIFE  
QEEVSSANISEEDLQLGFLRTVKGYSRCDNQSTYEFHLTLQSFFTALFLVIEERVGNKELLQFFNECS  
SAEAAQRTCFRVPWLKKPLTGEDPFRNNEHFHTNLFCLGILLSRSKEKLFKHLVSPAVIRKKRKLITY  
LGESMKSHLKGVTRSRPLMYNQVQVQPNFVWMLRCLYETQSEKVGKLAAKRMHANYIKLTYCNAYSADC  
SAISFVVHHFQKHLALDLNNDYGVKQLLPCFSKLAVIRLSVNQITDHGARILYEELSKYQIVSYL  
GLYNNQITDIGAKYVAKLIEECSSLEYVKIGANKITSEGGKCLAQAIQKSTTMFEIGMWGNQVGDEGAK  
AFADALRNHPRLTNVSLAFNGITTEGGKSIAEALQHNDSVKIFWLTKNELDDEAAMSFAEMLKINKKL  
VHLWLIQNQITAKGVKYLSEALKENTAIKEVCLNGNLISQEEAKAFESEERIICF

### >NLRC5-chicken-AEY11256.1

MQPTLQNDFFNLEGAVASIRPQLVEFLSHRLDWLLSASQHFLLPTAVLSGLAGVTDHREKVSVLLDLLEK  
AGHATWKQFAQCLCMECDLPLEMEILLMSSAGEGNLTQKQEAQTDASDQSSVPRGLTRRRRSSPISDK  
GAKQKRLDSAKEYQRLVDSICKRYGSRRAAGAAAQEPQPLAFSQAQFVNLVLRQSKASRLKERTDKPR  
EDVPSAPEPEECVDTAVRVSDLFGSVVRSGTTKVIIFLFGKPGTGKTMHHRICQKWAEGVLHQFLFTFL  
FEFRQLNLLKRKLTLKELLFDLFLQPEDSPDAVFQHLLENAQRTLIIFDGLDEFVGNMDVSSASKGSLN  
RSSSMSISELFAELCHGNLLPGCTVLVTSRPKRVPDFLINTVDLLAEVWGFDEKVEEYVSHYFRHHSF  
KEQAIHLKNNTKLLSMCQIPALCYVVCICLEYLLKHQTSVELPQMTQFYIKMLLIFINKQQGEHAG  
DEEAQLNSNKKAILGLCDLALKGLEAKKLVFVYVDIPEHVKEFASLHGLLTVFEVKTNSAHPETGYAFV  
HLSLQEFFAALCLMISKSVDKSHLKRKLSLKSQWTLRNEAKTGMESFHIIFLSGLSSKECRTFIMLLAE  
QSEAWVQDKQDAILQSLKKLAATQLTGPKVIELCHCTFETQGLEVAQHIGSLLNFKYEFKNFRLTPLDM  
SALVFVINSQGDVTHLDFAGCPLDTCLEMLASCRNVEHLSFRSRRFGDDFAAALSKGLGEMGSLKKLE  
VTGGSITAAGLTDMVQALSHCLQLEEINLQDNRIQNPDKVTVMELFSRMEKLLKIDLSKNSLSLNAVLL  
LAKEFIACQNAELHVRKDTVIIISFSGPSGKVPRLDLKREQNKECVTPTRHLRLCLQARCLSSQHAKE  
IVSILQSCPHLSEVDLSDNKLGDGCSFLLNLSWISISKQLNLSHNLLSVTGIYSLLKAVNTCQRVVE

VEVSLYHNTAVLRFTEDEGEFASPPASREEPLYPTDDQWDDKENQTPVPSKKIRLTYCRFQASDLEKLCA  
VLKECGSISELDLSNNYLGDEGLAQLLQFLPNLKTLSLKLNNHLSLSSVFCLAQSLCTLEHLETMDL  
SLGRMQVVHLTFGDRIRLRRTSRWRRSFLVHPKHVTNGQCFRLRNCTVGPEDVTRLCQMLTQCTQLTEI  
DLCGNALNDQSIERLLSFLPHFCQLTLLSIRNNTFSPCCAVLFANSINLCERIRRVEVRSSQNAFLHLR  
TSTQSQKTSCLRTDCAIGQRQIEKLCRVLEQHGCLAELDLNRNQLGDEVLRFLDLHLHRVPVTCNLNS  
HNRISQRGVLHLINTFTTSGNTTEVQVSLCSKATLI IKMTSRDDPRKILRLTECSFQPEHLEKLCVL  
NCTNLTECISNNNTVDAAGLLRSLSKTPGPLKISIEEPWVCKLSVTSLELAVQAAGNITAIMICK  
EKNLFQLGVRLPHCLEKVGSVVSRNLNEPEIKQACFYQRVHDKCTQLQELRWSHVELHDDTEMLVSIL  
LPLPDLKKFELTSCSFTPTGIDCLITGLQRCQAI EELNLGHMKLGDAIPKLVFGLCEMPSLKRLILNH  
NSIGDDGCSRLAEALSSMHCMEEINLGHNKIGDLGLINIAAVLLEMQNLKRIDLSGNCPSPAGGEKLME  
ALANCKHLEELILSRNDFGDTAVKLALCLPHMNRKILHLQHNNIGPAGGTALARALMACELLEESL  
SENNLGEGGIRALSEGLPRFEHLRKIELRLCGITDDASKLLSRGFQQCPAVEEIIILSWNALGDGGAQVL  
ASILPGMETLKMLDLEKNLIGACGATRLAEELVRCPEIQFIRLWDNPVPKGLAESLTSQDPRLCFSFC

### >NLRP3-chicken

MAGEESTIFLEALEGLTLEDQEFKKKLPHTDIKGGWNIGRDELEKVTHPSSLISYMGDSYGEAAMD  
AISLFEEMNQDLAEKILDEKVKEYKQKYTEHVAREFLQYKEANSCLGENLSVRDRYTNLT IARKSWDQ  
HGDEPGDVSSDVTVTQTLLPSKDGQVPPITVLVGASGMGKMTIRKVMMEWVEGTLCTQFDYVFCIDC  
KELSFKEVSMVDLISKCCPQQRMAGRILGNPEKILFIFDSFEALGLPLAQPKDELSTDPTEAKPLET  
TLLSLLRRTVLPESVLIATRPAALQSLGQCLEGKHYVEILGFSPAAREEYFHRYFGNDNKADVAFRFT  
RGNEVLYSLCVIPVMSWTVCTVLERELYERNQLLACSKTTTQMIMFYLSWLMKHRVSNWQNLQQLHLK  
LCSLAADGIWKHKVLFEEKEIEDQGLNQQLLSLFLNEKGLEKGDHVNVSFSLHLQELFAAMFYVL  
EDQDGMVSDSRILAKDVNMLLESYHTRSMDLNVTVRLLFGLVNPKSVEYAGEGIGCRISLQPQEDLLRW  
LQTRPRGTSHPREVMKIEDLDTFHLLFETNEKSFVQSVLGSFTGIALQDVKLTLYDQAALCFCIKQWAG  
LLSVTLWSCSFHQHHRQEPAGKGLPRQSWRQEELHSPHPLCQALGHPGSSLQSLRLQWCGLTEGDSGA  
LGTLLATLPSLVHLELGDGALGDDGVRMLCAGLRQPGCQLRVLR

### >NLRC3-chicken

MEEAWISRYRRQLMRSISPQFLEEIIIGYLQRLDLLTVEEAGRAQEASSLPEQVRVVDILAGKGSHASQ  
TLQSFIEETTNSQLYPLCAEPMVQKHLESLSQSFYGNLSLEIGSLQRLTNLLLVEGLTDIQKQEHDLQMEM  
TKGLRNVSKSIPLEKFLPLSKVSIPPRISVTMGVAGIGKSTLVKLFVGRWAKGLINRDIMFVPLPTFR  
ELNTYEKLSAERLIRSSFPHITEPNYISAGAARTLLILDGLDEFKTPLDFSNTVACTDPKKEIQVDNLI  
TNIIRGNLLQEASIWVTSRPTAASQIPGGLVDRMTEIRGFRATEMKDFLDQMFLDNKDLSGQVLHHIKA  
NRSLHIMCTVPGFCRIYGSSIGYYLKNSTGQPQEMTVAPKTLSEIYSYYFKMALSSDWPERRRET  
QAVNNSKKVMGSLGRLAFYGLLKRKHVFYEQDMKAYGIDLSLLHSSSLCSRLLLKEDMQPTTAYYFSLT  
IQEFLAAIYYYYTAAKRAIFDLFTESGMSWPKLGLNHFSAVQSLQAEDGQLDIFVRFLSGLLSPQVN  
QLLSGWLLVKDEHNSYRSQAISFLQGCLNTNYVISSQTVNTVHCLHEIQHTEIAKAVEEAMKNESLAGM  
LTPVNCSALAYLLQVSDVCVEETNLSNCLTYNICKSLPPLLFCHSLRLDNNQFKDNVMELLSGMSLVK  
DCQIQRLSLAENQICNKGAKALARSMLMVNRSLTVLDPRSNSIGPSGAKALADALKKNQVLLSLRLQHN  
IKEEGAAALAEALLTNRRILTLHLQKNSIGAHGARKLAEALQNCSELMLSSNSVGDNGSVALAEAL  
KVNHSLQSLDLQSNFISNTGVSALTAALCSNKGTLNLRENSISKEGGPAIAHALRTNCTLRKDLAA  
NLLHDEGGKAIAMKENRALTSHLQWNFIQTQAAVALAQALQSNDSLASDLQENAIGDEGMAALAA  
ALKVNTTLADLHLQVASISAAGAQLAEALMVNNSLQVLDLRGNSISVAGAKAMANALKVNRSLRWLNL  
QENSLGMDGAICIAALRGNHGLTYVNLQGNRIGQSGAKMISDAIRTNSPDCVVV

>NOD1-avian-ancestor

MEGQLCANLEISVEKPPGASPPSFIALLKVYRELLVSRI RNTQCLIDNLIKNDYFSTEDAEIVVQFPTQ  
ADKVRKILDLVQSKGEEVSEYFICVLQKVTDAYYELQPWLDEIGYEPSENICSKPVVNTDPVSRYCQKL  
RYELGRDSKFVMSYAQREEMLLEEIYSNSIMELVSFTNESLGEVCQLEALFDDAVGLINEDGETIYVFG  
DAGIGKSILLQKIQSLWARKELDIGAKFFFRFCRMFSCFKEDAICLKDLLFKYNCYPDQDPTEVFHH  
ILQFPHTVLFTHFDGFEIYSNFDLSSVPEMCSPNEPIHPLVLLVSLLRGKLLKGSKKILTARTGTEIQR  
NIIRKKVLLRGFSSNNLKEYTAMFFKDEGQRTLVLNQLEANPNLCSLCSVPLFCWIIIFKCYEHFHS MFD  
SHEL PDCSVTLTDVFLLMIEVHLNRSLKTSLLKNNTRSQAEMFKSRKETLLALGKMAYKGMENSFFIFE  
QEEVSSANISEGDLQLGFLRTVKGYSRCDNQSTYEFHLHTLQSFFTALFLVIEEKVGAKELLQFFNECS  
STETAQPTCLRIPWLKKQLAGEDPFRNNEHFHTNLFCLGLLSRSKQKLFRLVSPAVIKRKRKTLITY  
LGESMKSHLKG LTRSRLPNYNQVQVQPNFVWMLRCLYETQSEKVGKLA AKRMHANYIKLTYCNAYSADC  
SAISFVVHHFQKRLALDLNNDYGVKQLLPCFSKLAVIRLSVNQVTDHGVRILYEELSKYQIVSFL  
GLYNNQITDVGAKYVAKLIEECSSLEYVKIGANKITSEGGKCLAQAIQKSKTMFEIGMWGNQVGDEGAK  
AFAEALRNHPRLTNVSLAFNGITTEGGKSIAEALQHNNSVKIFWLTKNELDDEAAMSFAEMLKVNKKLV  
HLWLIQNQITAKGVKYLSEALKENTAIKEVCLNGNLISQEEAKAFENEERIICF

>NOD1-mammalian-ancestor

MEEQGHSEMEIIPSESHSHIKLLKINRELLVTHIRNTQCLVDNLLKNDYFSAEDAEIVCACPTQPDKVR  
KILDLVQSKGEEVSEFFLYVLQQLADAYVDLRPWLSEIGFSPSQLIQSKAVVNTDPVSRYTQQLRHQLG  
RDSKFMLCYAQKEELLLEEIYMDTIMELVGFSNESLGSLSLACLLDHTTGILNEQGETIFVFGDAGVG  
KSMLLQRLQSLWATGRLDAGVKFFFHFRCRMFSCKESDTLCLQDLLFKHYCYEQDPEEVFAFLLRFP  
HTALFTFDGLDELHSDFDLSRVPDSSCPWEPAPHLVLLANLLSGKLLKGASKLLTARTGIEVPRQLLRK  
KVLLRGFSPSHLRAYARRMFPERAVQERLLDQLEANPNLCSLCAVPLFCWIIIFRCFQHFHAAFE GSPQL  
PDCTVTLTDVFLLVTEVHLNRTQPSSLVQRNTRSPAETLRAGRDTLRSLGQVAHRGMEKSLFVFSQEEV  
QASELQEGDLQLGFLRALPELGPGGDQQSYEFFHLTLQAFFTAFFLVDDKVG TRELLRFFQEWTPPGE  
AAAASCYPFPFLPFQCLGGSGLAGEDPFKNKDHQFTNLFCLGLLSKAKQKLLRHLVPAAALRRKRKALW  
AHLFASLRSYLKSLPRVQSEGFNQVQAMPTFIWMLRCIYETQSQKVGQLAARGICANYLKLTYCNACSA  
DCSALS FVLHHFRKRLALDLNNDYGVRELQPCFSRLTVIRLSVNQITDSGVKVLCEELTKYKIVT  
FLGLYNNQITDVGARYVAKILDECKGLTHLKLKGNKITSEGGKCLALAVKNSKSIFEVGMWGNQIGDEG  
AKAFAEALRNHPSLTTLSLAFNGISTEGGKSLAWALQQNTSLRIFWLTKNELDDEVAESLAEMLKVNQT  
LKHLWLIQNQITAKGTAQLADALQKNTGITEICLNGNLIKPEEAKVFEDEKRIICF

>NLRC5-avian-ancestor

MQPPFQNDLDLEAAVASVRPQLVEFLSHRPDWLLTTSQRFLPGVVLNGLDGITDHREKVSVLLDLLEK  
AGPATWKQFAQYLCMECDLPLDLEILLMS SAGEGNFTQKQEA CTDVSARSSVPKGFARRRRSSSVSDK  
DAKQQRLDSAEKYRHLLIDSICQRYGSRRAGAAAQEPTQPLAFNQAFVNLVIRQSKASRLKERTDKPR  
EDVAGAPEPEECVDTAVKVSDFG SVVPSGTTKVIFLFGKPGTGKTMHRI CQKWAEGVLHQFLFTFL  
FEFRQLNLLKRKLT LKELLFDLFLQPEDSPDAVFQYLLENAQHTLIIFDGLDEFVGNMDVSSSSKGGPT  
LSSRMSISELFADLCHGNLLPGCTVLVTSRPKRLPDFLLNTVDLLAEIWGFDHEKV EYVSHYFHHSF  
KEQAI AHLKNNTKLLSMCLIPALCYVVCICLEYLLKHQMSVELPQTM TQFYIKMLLIFINKQQGERAG  
DEETQLNCNKKAILGLCDLALKGLEAKKLVFYVGD IPEHVKEFASLHGLLTVFEVKTS GTCPEAGYAFV  
HLSLQEFFAALCLMVSKRVDKNYLKKKFSLSKSWTLKNEAKTEFMESFHIFLSGLSSKECRTFLMLLAE  
QDEAWVQDKQDAILQSLKKLAATQLTGPKVIELCHCTFETQDLEVAQHIGSLLNFKYEFKNFRLTPLDM

SALVFVINSQDLTHLDFAGCLLDIDCLEVLAGCKNVEHLSFRSRRCGDDFAAALS KGLRGMGSLKKLE  
LTGGSITAEGMTNLVQALSHCLQLEEINLQDNRI RDPEVKRVMELFSRMEKLLKKIDLSNNNLSLNAVL I  
LAKEVIACQNATELRVRKDTV IISFSGPSGKVP RSLDLRWEENKEHVIPTRHLKLCLQDRCLSSQHAK E  
IVAILQSCPCLSEVDLSGNKLGDEGCSFLLES LPWISISKQLDL SHNRLSVTGICSL LKAVNTCQKVME  
VQVSLCHKTAVLRFTEDREFASLP PREEPVFSTDDQQYGEENQTPTASKKIRLTYCRFQASDLEKLC AV  
LKECGSISELDLSNNYLGD ELLQLFQFLPNLKMRLSLKLNQSLNSVFFLAQSLSTLEHIKTMNLS  
LGHMQVVHLTFGERIRVRSTSRWRSDSFLAHPKHVANGRCFRLRDCRVGPEDVTRLCQILAQCPQLTEI  
DLSGNSLSDQSIERLLSFLPYLCQLTLLSIRNNTFSRPRCTVLLINSINLCERIRMVEVRSSENAFLHLR  
ASTQSQKTSCLTDCAIGQGQIEELCRVLEQHGCLAELDL SRNQLGD EGLRCLLDHLHRVPVTC SLNLS  
HNRI SQDGVHLHINAFATSGNTTEVQVSLCSKATLI I KLT SRDDPRKILRLAECNFQPEHLEKLC LLL E  
KCTDLTEYISSNNNVTVQAAERLLHSLRKTGLPLKISIEEPWVCKESVTN LLELAVQACGNITEITICK  
DKNLFQLGVRFPHCLEKVESVVSRLNLYKPEIKHACFYQ RVREKCAQLQELRWSHVELHNDEAEMLVSI  
LLPLPELKKFGLTSSSIMPTGIDY LITGLQNCQAIEELNLGHMKLSSAAIPKLV LGLCEMPSLKRLILN  
HNSIGNDGCSRLAEALRNMHYMEEINLSHNKIGDPGLINLAAVLLEMQNLKRIDLSGNCPSPAGGEKLM  
EALAYCKHIEELILSRNGFGDRTAVKLALCLPHMTNLKILHLQHNNIGPAGGMELARALVVC ELL EIS  
LSENDLGE GSIHALSEGLPCFEHLRKIDLKL CGITDDASKSLSHGFRQCPAMEE IILSWNALGDGGAQE  
LASVLP GMEKLM LDLEKNRIGACGATKLAEE LAKCPEIQFIRLWDNPVPKGLAESLTSQDPRLCF SFC

#### >NLRC5-mammalian-ancestor

MDPVSLQLGNKNLWSWLVRLLSKDPEWLN AKVKFFLPNMDLSRNEALDPTQRVILQLNKLHAQGPATW  
QSF IHCVCMELEVPLDLEVL LLLSTWGHEDGFPSQLGAGEESQPESQLHHGLKRPHQSCGSSPRRKQCRK  
QQLELAKKYLQLLR TSAQQRYGSRIPGPGQPLAFHQAYVPPILQWSRASAPLDTQEGAIMGDPKAEDGT  
DVSILDLFNTKANKGPRVTVLLGKAGMGKTTLAHRLCQKWADGQLDRFQALFLFEFRQLNLITRFLTLP  
QLLFDLYLSPEADPD AVFQYLEENADQVLLIFDGLDEALQPCSSKETVGPDDPGSALT LFSGLCHGTLL  
PGCWVMATSRPGKLPA CLPTEAMVHMWFGDGRVEEYVNHFFSDQPSQE AALAE LRANGLR LRS MCAVP  
ALCQVACLCLHYHLLPGSSPGQSAALLPTMTQLYVQMV LALSPRGHLPAT SLLGLGEVALRGLETGKVI  
FSAEDIPPLMAFGAAHSLLTSFCIRTGPGHQETGYAFTHLSLQEFFAALHLMASPKVDKDTLTHHVTL  
NSRWVLR TKARLGLSDHLPTFLAGLASRTC RPFLSHLAQRDEVWVGAKQAAVVQVLRKLATRKL TGPKV  
VELCHCVGETQEPELASLIAQSLPYQLPFHNFPLTCADLATLTNILEHRDAPIHLDFDGCPL EPHCPEA  
LVGCGQVENLSFKSRKCGDAFAEALSRS LPTMGSLKMLGLAGSKITARGISHLVQALPLCPQLEEVSFQ  
DNQLKDQEV LNIVEVLPCLPRLQKLDLSRNSVCMSTLLCLAKVAVTCPTVRMLQVREADLIFLLSP PTE  
TAAELQGAPDLQGND SQRKGAQSRSLTLRLQKCQLRVHDAEALIAL LQEGPHLEEVDLSGNQLEDEGCR  
LMAEASQLHIARKLDLSDNGLSVAGVHCVLR AVSTCRTLAE LHISLLHKT VVLTFAQEPEEQEGIQKR  
AAFLDSLMLQMPSELPLSSRRIRLTHCGFQAKHLEQLCKALGGSCHLGHLDSLGNALGDEGVAQLAQLL  
PGLGPLQSLNLS ENGLSLDAVFSLAQCFSTLQWLFHLEISFESQHILLRGDR TGRDMLAAGSLPEFPAG  
AQFLGFGQRCIPRSFCLRECQLEPLSLTHLCDTLEKCPGPLEVQLSCEFLSDQSLETLLHRLPQLPQLS  
LLQLSQTGLSPRSPFLLADIFSLCPRVQKVDLRS LRHATLHFRSNEEQEGVCCRFTGCSLSQE HVEPLC  
WLLSKCKDLSQLDLSANLLGDSGLRCLLECLPQVPISGSLDSLHNSISQESALYL VETLPSCPRVREAS  
VNLGSEQSFRIHFSREEEAGKTLRLSECSFRPEHVSRLATGLS QSLQLTELTLTQCCLGLEQLTILLSL  
VRRPAGLFSLRVEEPWVG RAGVLTLLVEVCAQASGSVTEISIS E TQQQLCVQLEFP RQEENPEAVALRLA  
HCDLGTHHSLLRQLMETCARLQQLSLSQVNLCEDD DASSLLLQSLLLSLSELKTFRLTSSCVSTEGLA  
HLASGLGHCHHLEELDLSNNQFGEEGTKVLMGALEGKCR LKRLDSLHLPLDSSTLALLTQGLSHMTLLQ  
SLSLSRNSIGDVGCHLSEALRAATSLEELGLSHNQIGDTGAQH LAAILPGLPEL RKIDLSANSIGPAG  
GVQLAESLALCRHLEELMLGCNALGDPTALGLA QGLPQH LRVLHLPSSH LGPEGALSLAQALDGCPHVE

EISLAENNLAGGVPHFCKGLPLLRQIDLVSKIDDQTAKPLAASFTLCPALEEILLSWNLLGDEAAAEL  
AQVLPQMGRCLKRVDLEKNQITACGAWLLAEGLAQGSGIQVIRLWNNPIPPDMAQRLQSQEPRLDFAFFD  
NQPQAP
