# Supplementary material for: Structural and Evolutionary Adaptation of NOD‐Like Receptors in Birds
Source: Hindawi journal article supplement (doi:10.1155/2021/5546170), 2021-01-01
Supplement: f1 [file 5546170.f1.zip]

|   | NOD1 (47)                                                           | NLRP (38)                                               | NLRC3 (42)                                                   | NLRC5(32)                                                | RIP2(38)                                                     |
|---|---------------------------------------------------------------------|---------------------------------------------------------|--------------------------------------------------------------|----------------------------------------------------------|--------------------------------------------------------------|
| 1 | NOD1-chicken                                                        | NLRP3-chicken                                           | NP_849172.2<br>NM_178844.3<br>Homo sapiens                   | AEY11256.1<br>JQ044414.1<br>Gallus gallus                | NP_003812.1<br>NM_003821.6<br>Homo sapiens                   |
| 2 | NP_006083.1<br>NM_006092.4<br>Homo sapiens                          | AAI43360.1<br>BC143359<br>Homo sapiens                  | NLRC3-chicken                                                | NP_115582.4<br>NM_032206.4<br>Homo sapiens               | RIP2-chicken                                                 |
| 3 | XP_011594380.1<br>XM_011596078.1<br>Aquila chrysaetos canadensis    | XP_010709125.1<br>XM_010710823.1<br>Meleagris gallopavo | XP_010717657.1<br>XM_010719355.2<br>Meleagris gallopavo      | XP_009641653.1<br>XM_009643358.1<br>Egretta garzetta     | XP_015711414.1<br>XM_01585592.8.1<br>Coturnix japonica       |
| 4 | XP_003207269.1<br>XM_003207221.2<br>Meleagris gallopavo             | KFV98054.1<br>KK587607.1<br>Fulmarus glacialis          | XP_009276821.1<br>XM_009278546.1<br>Aptenodytes forsteri     | KFM02684.1<br>KL225750.1<br>Aptenodytes forsteri         | KFO74077.1<br>KL447477.1<br>Cuculus canorus                  |
| 5 | XP_010560686.1<br>XM_010562384.1<br>Haliaeetus leucocephalus        | KFP20708.1<br>KK502100.1<br>Egretta garzetta            | XP_010565343.1<br>XM_010567041.1<br>Haliaeetus leucocephalus | KFV17315.1<br>KL249984.1<br>Pterocles gutturalis         | XP_005150905.1<br>XM_00515084.8.2<br>Melopsittacus undulatus |
| 6 | XP_010300536.1<br>XM_010302234.1<br>Balearica regulorum gibbericeps | XP_009487832.1<br>XM_009489557.1<br>Pelecanus crispus   | XP_005436874.1<br>XM_005436817.2<br>Falco cherrug            | XP_010153118.1<br>XM_010154816.1<br>Eurypyga helias      | XP_010181516.1<br>XM_01018321.4.1<br>Mesitornis unicolor     |
| 7 | XP_010294769.1<br>XM_010296467.1<br>Phaethon lepturus               | KFM10527.1<br>KL226261.1<br>Aptenodytes forsteri        | XP_009880270.1<br>XM_009881968.1<br>Charadrius vociferus     | XP_009892792.1<br>XM_009894490.1<br>Charadrius vociferus | XP_014820946.1<br>XM_01496546.0.1<br>Calidris pugnax         |
|   |                                                                     |                                                         |                                                              |                                                          |                                                              |

|    |                                                                   |                                                      |                                                                  |                                                           |                                                            |
|----|-------------------------------------------------------------------|------------------------------------------------------|------------------------------------------------------------------|-----------------------------------------------------------|------------------------------------------------------------|
| 8  | XP_010205023.1<br>XM_010206721.1<br>Colius striatus               | KFQ68021.1<br>JJRF01090565.1<br>Phaethon lepturus    | XP_011598028.1<br>XM_011599726.1<br>Aquila chrysaetos canadensis | XP_009983127.1<br>XM_009984825.1<br>Tauraco erythrolophus | XP_014726238.1<br>XM_014870752.1<br>Sturnus vulgaris       |
| 9  | XP_010190983.1<br>XM_010192681.1<br>Mesitornis unicolor           | KFV12353.1<br>KL241692.1<br>Pterocles gutturalis     | XP_005244217.1<br>XM_005244160.1<br>Falco peregrinus             | XP_010006813.1<br>XM_010008511.1<br>Chaetura pelagica     | XP_017681969.1<br>XM_017826480.1<br>Lepidothrix coronata   |
| 10 | XP_010075327.1<br>XM_010077025.1<br>Pterocles gutturalis          | KGL99219.1<br>KL873572.1<br>Charadrius vociferus     | XP_009478793.1<br>XM_009480518.1<br>Pelecanus crispus            | EMC79680.1<br>KB375933.1<br>Columba livia                 | KQK75542.1<br>LMAW01002926.1<br>Amazona aestiva            |
| 11 | XP_010146090.1<br>XM_010147788.1<br>Eurypyga helias               | XP_008934994.1<br>XM_008936746.1<br>Merops nubicus   | XP_005150824.1<br>XM_005150767.1<br>Melopsittacus undulatus      | XP_014141836.1<br>XM_014286361.2<br>Falco cherrug         | XP_005042333.1<br>XM_005042276.2<br>Ficedula albicollis    |
| 12 | XP_010136979.1<br>XM_010138677.1<br>Buceros rhinoceros silvestris | KFP94830.1<br>JJRL01079955.1<br>Haliaeetus albicilla | KFP67380.1<br>KK523803.1<br>Cariama cristata                     | XP_013152548.1<br>XM_013297094.1<br>Falco peregrinus      | XP_005479583.1<br>XM_005479526.2<br>Zonotrichia albicollis |
| 13 | XP_009970885.1<br>XM_009972583.1<br>Tyto alba                     | KFQ33932.1<br>KK808678.1<br>Mesitornis unicolor      | KFV80758.1<br>KL206272.1<br>Struthio camelus australis           | KFP82096.1<br>KL373453.1<br>Apaloderma vittatum           | XP_005517100.1<br>XM_005517043.2<br>Pseudopodoces humilis  |
| 14 | XP_009987988.1<br>XM_009989686.1<br>Tauraco erythrolophus         | KFV56684.1<br>KK394856.1<br>Tyto alba                | KFQ12821.1<br>KK681585.1<br>Leptosomus discolor                  | KFO71370.1<br>KL447260.1<br>Cuculus canorus               | KFP59105.1<br>KL334407.1<br>Cathartes aura                 |
|    |                                                                   |                                                      |                                                                  |                                                           |                                                            |

|    |                                                                  |                                                                   |                                                             |                                                                    |                                                           |
|----|------------------------------------------------------------------|-------------------------------------------------------------------|-------------------------------------------------------------|--------------------------------------------------------------------|-----------------------------------------------------------|
| 15 | XP_010005792.1<br>XM_010007490.1<br>1<br>Chaetura<br>pelagica    | KFQ43372.1<br>JJRH01073841.1<br>Nestor notabilis                  | EMC86605.1<br>KB375484.1<br>Columba livia                   | KFW81197.1<br>KL671099.1<br>Manacus<br>vitellinus                  | EOA94323.1<br>KB744834.1<br>Anas<br>platyrhynchos         |
| 16 | XP_010019083.1<br>XM_010020781.1<br>1<br>Nestor notabilis        | KFO97775.1<br>KL217671.1<br>Calypte anna                          | KFW03889.1<br>KK565216.1<br>Eurypyga helias                 | XP_012425009.1<br>XM_012569555.1<br>1<br>Taeniopygia<br>guttata    | KFP60755.1<br>KK504190.1<br>Cariama<br>cristata           |
| 17 | XP_009946267.1<br>XM_009947965.1<br>1<br>Leptosomus<br>discolor  | KFO06954.1<br>KL477839.1<br>Balearica<br>regulorum<br>gibbericeps | KFQ93251.1<br>KL410017.1<br>Nipponia nippon                 | XP_008637076.1<br>XM_008638854.1<br>1<br>Corvus<br>brachyrhynchos  | KFQ90254.1<br>KK436006.1<br>Phoenicopterus<br>ruber ruber |
| 18 | XP_009936361.1<br>XM_009938059.1<br>1<br>Opisthocomus<br>hoazin  | KFQ14462.1<br>KK685703.1<br>Leptosomus<br>discolor                | XP_010390880.1<br>XM_010392578.1<br>Corvus cornix<br>cornix | XP_010401762.1<br>XM_010403460.1<br>2<br>Corvus cornix<br>cornix   | KFQ63971.1<br>KK492683.1<br>Pelecanus<br>crispus          |
| 19 | XP_009906304.1<br>XM_009908002.1<br>1<br>Picoides<br>pubescens   | KFR07514.1<br>KL411427.1<br>Nipponia nippon                       | KFQ47237.1<br>KK936178.1<br>Nestor notabilis                | XP_014110900.1<br>XM_014255425.1<br>1<br>Pseudopodoces<br>humilis  | KFM04929.1<br>KL225928.1<br>Aptenodytes<br>forsteri       |
| 20 | XP_009877889.1<br>XM_009879587.1<br>1<br>Charadrius<br>vociferus | KFP59004.1<br>JJRQ01066678.1<br>Cariama cristata                  | KFQ30606.1<br>KK803699.1<br>Mesitornis<br>unicolor          | XP_014124554.1<br>XM_014269079.1<br>2<br>Zonotrichia<br>albicollis | KFQ74688.1<br>KK452971.1<br>Phaethon<br>lepturus          |
| 21 | XP_009871122.1<br>XM_009872820.1<br>1<br>Apaloderma<br>vittatum  | KFV14857.1<br>KL463662.1<br>Tauraco<br>erythrolophus              | XP_009584531.1<br>XM_009586236.1<br>Fulmarus glacialis      | XP_009089123.1<br>XM_009090875.1<br>1<br>Serinus canaria           | KFQ07057.1<br>KK659212.1<br>Haliaeetus<br>albicilla       |
|    |                                                                  |                                                                   |                                                             |                                                                    |                                                           |

|    |                                                                     |                                                                  |                                                             |                                                                       |                                                           |
|----|---------------------------------------------------------------------|------------------------------------------------------------------|-------------------------------------------------------------|-----------------------------------------------------------------------|-----------------------------------------------------------|
| 22 | XP_009704884.1<br>XM_009706582.1<br>1<br>Cariama cristata           | XP_012984385.1<br>XM_013128931.1<br>1<br>Melopsittacus undulatus | KFO13787.1<br>KL498635.1<br>Balearica regulorum gibbericeps | KFV79923.1<br>KL206199.1<br>Struthio camelus australis                | KFW05819.1<br>KK568428.1<br>Eurypyga helias               |
| 23 | XP_009812730.1<br>XM_009814428.1<br>1<br>Gavia stellata             | EMC82280.1<br>KB375693.1<br>Columba livia                        | KFR16430.1<br>KK735903.1<br>Opisthocomus hoazin             | EOB01028.1<br>KB743139.1<br>Anas platyrhynchos                        | KFW67401.1<br>KL225093.1<br>Pygoscelis adeliae            |
| 24 | XP_009638465.1<br>XM_009640170.1<br>1<br>Egretta garzetta           | KFP73142.1<br>KK826479.1<br>Acanthisitta chloris                 | KFP12002.1<br>KK501007.1<br>Egretta garzetta                | KFW60959.1<br>KL224535.1<br>Pygoscelis adeliae                        | KFU96217.1<br>KN127212.1<br>Chaetura pelagica             |
| 25 | XP_009686170.1<br>XM_009687875.1<br>1<br>Struthio camelus australis | XP_008924714.1<br>XM_008926466.1<br>1<br>Manacus vitellinus      | KFP76274.1<br>KK830666.1<br>Acanthisitta chloris            | XP_013032006.1<br>XM_013176552.1<br>1<br>Anser cygnoides domesticus   | KFR17723.1<br>KK736152.1<br>Opisthocomus hoazin           |
| 26 | XP_009581032.1<br>XM_009582737.1<br>1<br>Fulmarus glacialis         | XP_012429272.1<br>XM_012573818.1<br>1<br>Taeniopygia guttata     | KFP91701.1<br>KL391228.1<br>Apaloderma vittatum             | XP_011572067.1<br>XM_011573765.1<br>1<br>Aquila chrysaetos canadensis | KFR01688.1<br>KL410965.1<br>Nipponia nippon               |
| 27 | XP_009570032.1<br>XM_009571737.1<br>1<br>Cuculus canorus            | XP_005426581.1<br>XM_005426524.1<br>1<br>Geospiza fortis         | KFW75266.1<br>KL669029.1<br>Manacus vitellinus              | XP_010581551.1<br>XM_010583249.1<br>1<br>Haliaeetus leucocephalus     | KFP01549.1<br>KL218031.1<br>Calypte anna                  |
| 28 | XP_009469903.1<br>XM_009471628.1<br>1<br>Nipponia nippon            | XP_010390336.1<br>XM_010392034.1<br>1<br>Corvus cornix cornix    | KFQ69060.1<br>KK437097.1<br>Phaethon lepturus               | XP_009931924.1<br>XM_009933622.1<br>1<br>Opisthocomus hoazin          | KFP88042.1<br>KK846543.1<br>Acanthisitta chloris          |
| 29 | XP_009485014.1<br>XM_009486739.1<br>1<br>Pelecanus crispus          | KFV79209.1<br>KL206137.1<br>Struthio camelus australis           | XP_005523203.1<br>XM_005523146.1<br>Pseudopodoces humilis   | KFP40615.1<br>KK747278.1<br>Chlamydotis macqueenii                    | KFO87475.1<br>KL514241.1<br>Buceros rhinoceros silvestris |
|    |                                                                     |                                                                  |                                                             |                                                                       |                                                           |

|    |                                                                |                                                                     |                                                           |                                                                     |                                                             |
|----|----------------------------------------------------------------|---------------------------------------------------------------------|-----------------------------------------------------------|---------------------------------------------------------------------|-------------------------------------------------------------|
| 30 | XP_009281840.1<br>XM_009283565.1<br>1<br>Aptenodytes forsteri  | KFV66995.1<br>KL215850.1<br>Picoides pubescens                      | KFU86376.1<br>KN126074.1<br>Chaetura pelagica             | XP_009289022.1<br>XM_009290747.2<br>Aptenodytes forsteri            | KFP33539.1<br>KK550202.1<br>Colius striatus                 |
| 31 | XP_009084409.1<br>XM_009086161.1<br>1<br>Serinus canaria       | KFP48228.1<br>JMFT01165428.1<br>Cathartes aura                      | KFP33880.1<br>KK551428.1<br>Colius striatus               | XP_012955436.1<br>XM_013099982.2<br>Anas platyrhynchos              | KFO57232.1<br>KK718509.1<br>Corvus brachyrhynchos           |
| 32 | XP_009080014.1<br>XM_009081766.1<br>1<br>Acanthisitta chloris  | KFQ86160.1<br>KK419318.1<br>Phoenicopterus ruber ruber              | KFO88859.1<br>KL518566.1<br>Buceros rhinoceros silvestris | XP_013804078.1<br>XM_013948624.1<br>1<br>Apteryx australis mantelli | XP_010403308.1<br>XM_010405006.1<br>Corvus cornix cornix    |
| 33 | XP_008946501.1<br>XM_008948253.1<br>1<br>Merops nubicus        | KFP43339.1<br>KK755995.1<br>Chlamydotis macqueenii                  | KFV66077.1<br>KL215669.1<br>Picoides pubescens            |                                                                     | KFO13799.1<br>KL498661.1<br>Balearica regulorum gibbericeps |
| 34 | XP_008931768.1<br>XM_008933520.1<br>1<br>Manacus vitellinus    | XP_005030014.1<br>XM_005029957.4<br>Anas platyrhynchos              | KFO63309.1<br>KK719436.1<br>Corvus brachyrhynchos         |                                                                     | KFV81187.1<br>KL206309.1<br>Struthio camelus australis      |
| 35 | XP_008632142.1<br>XM_008633920.1<br>1<br>Corvus brachyrhynchos | XP_013053803.1<br>XM_013198349.1<br>1<br>Anser cygnoides domesticus | XP_009813859.1<br>XM_009815557.1<br>Gavia stellata        |                                                                     | KGL77642.1<br>KL890349.1<br>Tinamus guttatus                |
| 36 | XP_008502603.1<br>XM_008504381.1<br>1<br>Calypte anna          | XP_013800818.1<br>XM_013945364.1<br>1<br>Apteryx australis mantelli | XP_005054364.1<br>XM_005054307.1<br>Ficedula albicollis   |                                                                     | KFZ59450.1<br>KL260561.1<br>Podiceps cristatus              |
| 37 | XP_005510067.1<br>XM_005510010.1<br>1<br>Columba livia         | KFZ66821.1<br>KL277519.1<br>Podiceps cristatus                      | XP_012432118.1<br>XM_012576664.1<br>Taeniopygia guttata   |                                                                     | KFQ47898.1<br>KK937278.1<br>Nestor notabilis                |
|    |                                                                |                                                                     |                                                           |                                                                     |                                                             |

|    |                                                             |                                                              |                                                          |  |                                                    |
|----|-------------------------------------------------------------|--------------------------------------------------------------|----------------------------------------------------------|--|----------------------------------------------------|
| 38 | XP_005519048.1<br>XM_005518991.1<br>Pseudopodoces humilis   | XP_010166178.1<br>XM_010167876.1<br>Antrostomus carolinensis | XP_005425321.1<br>XM_005425264.2<br>Geospiza fortis      |  | KFV95703.1<br>JJRN01099669.1<br>Fulmarus glacialis |
| 39 | XP_005424013.1<br>XM_005423956.1<br>Geospiza fortis         |                                                              | KFV16485.1<br>KL465932.1<br>Tauraco erythrolophus        |  |                                                    |
| 40 | XP_005481045.1<br>XM_005480988.1<br>Zonotrichia albicollis  |                                                              | KFO71219.1<br>KL447254.1<br>Cuculus canorus              |  |                                                    |
| 41 | XP_005445923.1<br>XM_005445866.1<br>Falco cherrug           |                                                              | XP_010077294.1<br>XM_010078992.1<br>Pterocles gutturalis |  |                                                    |
| 42 | XP_005242310.1<br>XM_005242253.1<br>Falco peregrinus        |                                                              | XP_009090413.1<br>XM_009092165.1<br>Serinus canaria      |  |                                                    |
| 43 | XP_005143803.1<br>XM_005143746.1<br>Melopsittacus undulatus |                                                              |                                                          |  |                                                    |
| 44 | XP_005040913.1<br>XM_005040856.1<br>Ficedula albicollis     |                                                              |                                                          |  |                                                    |
| 45 | XP_002196320.1<br>XM_002196284.2<br>Taeniopygia guttata     |                                                              |                                                          |  |                                                    |
|    |                                                             |                                                              |                                                          |  |                                                    |

|    |                                                   |  |  |  |  |
|----|---------------------------------------------------|--|--|--|--|
| 46 | AFS49704.1<br>JX465487.1<br>Gallus gallus         |  |  |  |  |
| 47 | AFP44845.1<br>JQ868803.1<br>Anas<br>platyrhynchos |  |  |  |  |
