# Supplementary material for: Structural and Evolutionary Adaptation of NOD‐Like Receptors in Birds
Source: Hindawi journal article supplement (doi:10.1155/2021/5546170), 2021-01-01
Supplement: f1 [file 5546170.f1.zip]

>NP\_003812.1\_Homo\_sapiens

MNG-----EAICSAIPTIPYHKLADLRYLSRGASGTVSSARHADWRVQVAVKHLH  
IHTPLLDSEKDVDLREAEILHKARFSYILPILGICNEPEFLGIVTEYMPNGSLNELLHRK  
TEYPDVAWPLRFRILHEIALGVNYLHNMTPLHDLKTQNILLDNEFHVKIADFGLSKW  
RMMSLSQSRSSKSAPEGGTIIYMPENYEPGQKSRASIKHDIYSYAVITWEVLSRKQPFE  
DVTNPLQIMYSVSQGHRPVINEESLPYDIPHRARMISLIESGWAQNPDERPSFLKCLIEL  
EPVLRTFEEITFLEAVIQLKKTQLQSVSSAIHLCDKKK--MELSLNIPV--NHGPQEESC  
GSS----QLHENSGSPETSRLPAPQDNDFLSRKAQ-----  
-----DCYFMKLHHCPGNHSWDSTISGSQRAAFCD  
HKT-T---PCSS--AII-----NPLSTAGNSERLQPGIAQQWIQSK**REDIV**  
NQMTEACLNQSLDALLSRDLIMKEDYELVSTKPT**RTSKVR**QLLDTTDIQGEFAKIVIVQK  
LKDNKQMLQPYPEILVVSRSPLNLLQNKSM

>RIP2-gallus

MSGGAG--G--DRAGAISSALPAIPSSKLPDLRFLSRGAYGTVSAARHADWRVPVALKCL--  
--QGPLLDSDRNHLLKEAEILHKARFSYILPILGICNEPDLGIVTEYMANGSLNQLLHGK  
DMYPDIAWCLRYRILYEIALGVNYLHNMPPLHDLKTQNILLDDEFHVKIADFGMSKW  
RVISMSQSRSETSLPEGGTIVYMPPELYNPSQKTRASVKHDIYSFAIIWEVMSRKHPFE  
EVINPLQIMYSVSQGHRLDLSETSLMDIPHRALVIRLIESGWAQNPDERPSFLKCLIDL  
EPVLRTFDEIAILEAVILLKRKSKYESPCIHKSGKKAIVEKTPLNIPL--N--PQET--  
SASIHCDALPLRSVSPDISRLKSLPQCNISS--GTA-----GEKAEK-----  
----T-----I--GFTAVK--QSIKKCADGDSGG--LNSLSCQSADENLSVTQSAKPFV  
HPY--S----YLPSSDKNISVASNSSCMLQTSPISDFVLETIQQNVAHQWIQSK**REEII**  
DQMTEACLNQSLDALLSRFLMKEDYELISTKPT**RTSKVR**QLLDTSDSQGEFARIIVQK  
LKDNKQLGLQPYPDIV--PNSLRL-----HL

>XP\_015711414.1\_Coturnix\_japonica

MSGGEG--G--GRADAISSALPAISSKLPDLRFLSRGAYGTVSAARHADWRVPVALKCL--  
--QGPLLDSDRNHLLKEAEILHKARFSYILPILGICNEPDLGIVTEYMANGSLNQLLHGK  
DMYPDIAWCLRYRILYEIALGVNYLHNMPPLHDLKTQNILLDDEFHVKIADFGMSKW  
RVISMSQSRSETSLPEGGTIVYMPPELYNPSQKTRASVKHDIYSFAIIWEVMSRKHPFE  
EVINPLQIMYSVSQGRDLSEKSLMDIPHRALVIRLIESGWAQNPDERPSFLKCLIDL  
EPVLRTFDEIAILEAVILLKRKSKYESRYIHKSGNKVFVEKSSLNIPV--N--PQET--  
SASIHCDALPLRSISPDISRLKSLPQCNISS-----  
-----DADSGA--PHSLSCQTVDENLSVTQSAKPFV  
HPC--G----CLSSDKNISVSSHSSCMLQTSPISDFVLETIQQNVAHQWICK**REEII**  
DQMTEACLNQSLDALLSRFLMKEDYELISTKPT**RTSKVR**QLLDTSDSQGEFARIIVQK  
LKDNKQLGLQPYPDIV--SNSLRL-----HL

>KF074077.1\_Cuculus\_canorus

MSGGDG--G--SRAGTISYALPSIPSSKLPDLRFISRGAYGTVSAARHADWRVPVALKCL--  
--QGPLLDSDRNHLLKEAEILHKARFRYILPILGICNESEFLGIVTEYMTNGSLNQLLHGK  
DVYPDAWCLRFRILYEIALGVNYLHNMPPLHDLKTQNILLDDEFHVKIADFGMSKW  
RVISMSQSRSETSLPEGGTIIYMPPELYNPSQKTRASVKHDIYSFAIIMWEVMSRKQPFE  
EVINPLQIMYSVSQGRDLSEESLSVDVPHRALIRLIESGWAQNPDERPSFLKCLIDL  
EPVLRTFEEDMLEAVILLKRKSLYESRCLYNSEKKADVEQISLNIPL--N--SQEETY  
SASIQCDAALPLRSISSDISRLESVPKCNISS--GRD-----THDFIVLF-----  
---EH-----R--SNTTLF--FFYFFFKDGNSSG--VDPLSSLSTDENISVSQSAKLLV

HPH-R----YFPSSDKNISGASNAASCVLRSSPTPSDFVLETIQQNVAHQWIQSK**REEII**  
DQMTEACLNQSLDALLSRFLMKEDYELISTKPT**RTSKVR**QLLDTSDSQGEEFARII IQK  
LKDNKQLGLQPYPDVV--SNSLRL-----HL

>XP\_005150905.1\_Melopsittacus\_undulatus

MSGSD--G-GGAGAISYALPSISSNKLPLDLRFISRGAYGTVSAARHADWRVPVALKCL--  
-QGPLLDSDRNHLLKEAEILHKARFSYILPILGICNEPEFLGIVTEYMTNGSLNQLLHGK  
DLYPDIPWCLRFRILEYEIALGVNYLHNMNPPLHHDLKTQNILLDDEFHVKIADFGMSKW  
RVISMSQSRSETSLPEGGTIIYMPPEYNPSQKTRASVKHDIYSYAIIMWEVMSRKQPFE  
EVINPLQIMYSVSQGGRLDLSEESLSMDIPHRVII IKLIESGWAQNPDERPSFLKCLIDL  
EPVLRFTDEIAMLEAVILLKRSKSLYESQCIYKSGKQADAEQMSLNIPL--N--PHEETY  
SGSIQCDALPLRSISPDISRLKSVPKCNILSS-----

-----GGSSGD-LQSLSSQSTDENISVTQSAKLLV  
HPY-S----YSPSSDKSISDARNPASCMLRSSPVPSAFVLETIQQNVAHQWIQSK**REEII**  
DQMTEACLNQSLDALLARFLMKEDYELISTKPT**RTSKVR**QLLDTSDSQGEEFARII IQK  
LKDNKQLGLQPYPDIV--PNSLRL-----HL

>XP\_010181516.1\_Mesitornis\_unicolor

MSGEDG--G-GRAGAICYALPSIPSNKLPLDLRFISRGAYGTVSTARHADWRVPVALKCL--  
-QGPLLDSDRNHLLKEAEILHKARFSYILPILGICNEPEFLGIVTEYMTNGSLNQLLHGK  
DVYPDIPWCLRFRILEYEIALGVNYLHNMNPPLHHDLKTQNILLDDEFHVKIADFGMSKW  
RVISMSQSRSETSLPEGGTIIYMPPEYNPSQKTRASVKHDIYSYAIIMWEVMSRKQPFE  
EVINPLQIMYSVSQGGRLDLSEESLSMEIPHRALII RLIGSGWAQNPDERPSFLKCLIDL  
EPVLRFTDEIAMLEAVILLKRSKSQYESRCIYKSRNKADVEQISLNIPL--N--PQEETY  
SASIQCDALPLRSISPDISLKSVPKCNILST-----

-----DANS GD-LHSLSSQSTDENMSVTQSAKLLV  
HSC-S----YFPSSDKSISDASNSSPCMLRSSPVPSDFVLETMQQNIAHQWIQSK**REEII**  
DQMTEACLNQSLDALLSRFLMKEDYELISTKPT**RTSKVR**QLLDTSDSQGEEFARII IQK  
LKDNKQLGLQPYPNIV--SNSLRL-----HL

>XP\_014820946.1\_Calidris\_pugnax

MSGGGA--EEIRAGSISYSLPSIPSNKLPLDLRFISRGVYGTVSSARHADWRVPVALKCL--  
-QGPLVDSHREYLLKEAEILHKARFSYILPILGICNEPEFLGIVTEYMTNGSLNQLLHGK  
DVYPDLPWCLRFRILEYEIALGVNYLHNMNPPLHHDLKTQNILLDDEFHVKIADFGMSKW  
RVISMSQSRSETSLPEGGTIIYMPPEYHPSQKTRASVKHDIYSYAIIMWEVMSRKQPFE  
EVINFWQIMYSVSQGGRLDLSEESLSMDIPHRDLII KLIGSGWAQNPDERPSFLKCLIDL  
EPVLRFTDEIAMLEAVLLLKRSKSLYESRCIYKSGKTDVEQISLNIPL--N--PQEETY  
SGSLQCEALPLRSISPDMSRLKSIPKCNILSS-GTSAVKTDETIDFTALKQG-----

----I-----K--KC-AEVLQTWRYSGRGENSEG-LESLSSQSTDENISVTQSAKPLM  
QTY-S----NFPSSGKSVSDASNSASCVRQSSPIPSDLVLETIQHNIAHQWIQSK**REEII**  
DQMTEACLNQSLDALLSRFLMKEDYELISTKPT**RTSKVR**QLLDTSDSQGEFAKII IQK  
LKDNKQLGLQPYPDIV--SNSLRL-----HL

>XP\_014726238.1\_Sturnus\_vulgaris

MSGGDG--GRGRAGALSYGLPSIPSSKLPLDLRFISRGAYGTVSAARHADWRVPVALKCL--  
-QGPLLDSDRNHLLKEAEILHKARFTYILPILGICNEPEFLGIVTEYMTNGSLNQLLHGK  
DIYDPDIPWCLRFRILEYEIALGVNYLHNMNPPLHHDLKTQNILLDDEFHVKIADFGMSKW  
RVISMSQSRSESSLPEGGTIIYMPPEYNPSQKTRASVKHDIYSYAVII WEVMSRKQPFE  
EVINPLQIMYSVSQGGRLDLSEGLSMDIPHRGLII RLMESGWAQNPDERPSFLKCIIDL

EPVLRTFDEIAVLEAVILLKRSKSLYESQSIYRSGKKANVEQISLNIPL--N--PEKPTY  
 SSSIQCDA LPLRSISPDISKFKSIPQYNILSS-----  
 -----DGNSGC-LHSLSSQSTDGNLSVTQSAKLLV  
 HPY-S----TVLSSDKSISDASGSASHVLRSSPIPSDFVLETTQQNVAHQWISKREQII  
 DQMTEACLNQSLDALLSRFLMKEDYELISTKPT**RTSKVR**QLLDTSDSQGEEFARIIVQK  
 LKDNKQLGLQPYPDIV--SNSQRL-----HL  
 >XP\_017681969.1\_Lepidothrix\_coronata  
 MSSGDG--GEGRAGAISYALPSIPSNKLPDLRFISRGAYGTVSAARHADWRVPVALKCL--  
 -QGPLLDSDRNHLLKEAEILHKARFSYILPILGICNEPEFLGIVTEYMTNGSLNQLLHGK  
 DIYDPDPWCLRFRTLYEIALGVNYLHNMNPPLHHD LKTQNI LL DDEFHVKIADFGMSKW  
 RVISMSQSRSESSLPEGGTIIYMPPE DYNPSQKTRASVKHDIYSYAIIMWEVMSRKQPFE  
 EVINPLQIMYSVSQGGRLDLSEESLSMDIPHRVLIIRLMESGWAQNPDERPSFLKCLIDI  
 EPVLRTFDEIAMLEAVILLKRSKSLYESQGIYKSAKKANVEQISLNIPL--N--PQKETY  
 SGSIQCDA LPLRSISPDISKLSIPQCNILSS-----  
 -----DGNSGC-LYSLSSQSMDDNISVTQSAKLLV  
 HPCTS----NVPSSDRSISDASKSASCILQSPLIPSDVLETTQQNVAHQWISK**REEII**  
 DQMTEACLNQSLDALLARFLMKEDYELISTKPT**RTSKVR**QLLDTSDSQGEEFARIIVQK  
 LKDNKQLGLQPYPDIV--SNSQRL-----HP  
 >KQK75542.1\_Amazona\_aestiva  
 MSGGDG--G--GRAGAISYALPSIPSNKLPDLRFISRGAYGTVSAARHADWRVPVALKCL--  
 -QGPLLDSDRNHLLKEAEILHKARFSYILPILGICNEPEFLGIVTEYMTNGSLNQLLHGK  
 DLYDPDPWCLRFRI LYEIALGVNYLHNMNPPLHHD LKTQNI LL DDEFHVKIADFGMSKW  
 RVISMSQSRSETSLPEGGTIIYMPPE DYNPSQKTRASVKHDIYSYAIIMWEVMSRKQPFE  
 EVINPLQIMYSVSQGGRLDLSEESLSMDVPHRVII IKLIESGWAQNPDERPSFLKCLIDL  
 EPVLRTFDEIAMLEAVILLKRSKSLYESRCIYKSGKQADAEQISLNIPL--N--PHEETY  
 SGSIQCDA LPLRSISPDISRLKSAPKCNVLSS-----  
 -----DGSSGG-VXSLSSQSTDENISVTQSAKLLV  
 HPX-S----CSPSSDKNISDATNPASCILRSPVPFAFLLETTQQNVAHQWISK**REEII**  
 DQMTEACLNQSLDALLARFLMKEDYELISTKPT**RTSKVR**QLLDTSDSQGEEFARII IQK  
 LKDNKQLGLQPYPDIV--PNSLRL-----HL  
 >XP\_005042333.1\_Ficedula\_albicollis  
 MSGGD----GRAGALSYGLPSIPSSKLPDLRFISRGAYGTVSAARHADWRVPVALKCL--  
 -QGPLLDSDRNHLLKEAEILHKARFTYILPILGICNEPEFLGIVTEYMTNGSLNQLLHGK  
 DEYDPDPWCLRFRI LYEIALGVNYLHNMNPPLHHD LKTQNI LL DDEFHVKIADFGMSKW  
 RVISMSQSRSESSLPEGGTIIYMPPE DYNPSQKTRASVKHDIYSYAVIMWEVMSRKQPFE  
 EVINPLQIMYSVSQGGRLDLSEGLSMDIPHRGLIIRLMESGWAQNPDERPSFLKCLIDL  
 EPVLRTFDEIALLEAVILLKRSKSLYESQSIYKSGKKANMEQMSLNIPL--N--SEKPTY  
 SSSIQCDA LPLRSIPDTSKFKSIPQCNILSS-----  
 -----DGNSGC-LHSLSSQSM DGNLSVTQSAKLLV  
 HPY-G----TVLSSDKSNSDASSASCVLRSPIPSDFVLETTQQNVAHQWISK**REQII**  
 DQMTEACLNQSLDALLSRFLMKEDYELISTKPT**RTSKVR**QLLDTSDSQGEEFARII IQK  
 LKDNKQLGLQPYPDIV--SNSQRL-----HL  
 >XP\_005479583.1\_Zonotrichia\_albicollis  
 MSGDGGGG--GRAGALSYGLPSIPSSKLPDLRFISRGAYGTVSAARHADWRVPVALKCL--  
 -QGPLLDSDRNHLLKEAEILHKARFSYILPILGICNEPEFLGIVTEYMTNGSLNQLLHGK

DVYPDIPWCLRFRILEYEIALGVNYLHNMNPPLLHHD LKTQNILLDDEFHVKIADFGMSKW  
RVISTSQSRSESSLPEGGTIVYMPPE DYNPSLKTASVKHDIYSYAVIIWEVMSRKQPFE  
EVINPLQIMYSVSQGGRLDLSEGLSMDIPHRGLIIRLMESGWAQNPDERPSFLKCLIDL  
EPVLRFTFDEIAMLEAVLLLKRKSLYESQSIYKSGKKGNVEQIPLNIPL--N--PEKPTY  
SSSIECDPLPLRSIPPDTSKFKSIPQCNI LSS-----

-----DGNSGC-LHSLSSQSTDENLSVTQSAKLLV  
HPY-S----AGLSPARGISDAPSSASHVLRSSPIPPDFVLETMQKNVAHQW IQSK**REEII**  
DQMTEACLNQSLDALLSRFLLMKEDYELISTKPT**RTSKVR**QLLDTSDSQGEEFARIIVQK  
LKDNKQLGLQPYPDIV--SNSQRL-----HL

>XP\_005517100.1\_Pseudopodoces\_humilis

MSGGDA--GGGRTGTLSYGLPSIPSSKLPDLRFISRGAYGTVSAARHADWRVPVALKCL--  
--QG PLLDSDRNHLLKEAEILHKARFSYILPILGICNEPEFLGIVTEYMANGLNQL LHGK  
DVYPNIPWCLRFRILEYEIALGVNYLHNMNPPLLHHD LKTQNILLDDEFH IKIADFGMSKW  
RVISMSQSRSESSLPEGGTIIYMPPE DYNPSQKHRASVKHDIYSYAVIMWEVMSRKQPFE  
EVINPLQIMYSVSQGGRLDLSEGLSMDIPHRGLIIRLMESGWAQNPDERPSFLKCLIDL  
EPVLRFTFDEIAMLEAVILLKRKSLYESQSIYKSGKKANVEQISLNIPL--N--PEKPMY  
YSSIQC DALPLRSISPDTSKFKSIPQCNI LSS-----

-----DGDSGC-LHSLSSQSM DGNLSVTQSARPLV  
HPN-S----TVLSSDKNISEASSSASSVLTSSPIPSDFVLETIQQNV AHQW IQSK**REEII**  
DQMTEACLNQSLDALLSRFLLMKEDYELISTKPT**RTSKVR**QLLDTSDSQGEEFARVIVQK  
LKDNKQLGLQPYPDIV--SNSQRL-----HL

>KFP59105.1\_Cathartes\_aura

-----SDRNHLLKEAEILHKARFSYILPILGICNEPEFLGIVTEYMTNGSLNQL LHGK  
DVYPDIPWCLRFRILEYEIALGVNYLHNMNPPLLHHD LKTQNILLDDEFHVKIADFGMSKW  
RVISMSQSRSETSLPEGGTIIYMPPE DYNPSQKTRASVKHDIYSYAIIMWEVMSRKQPFE  
EVINPLQIMYSVSQGGRLDLSEESLSMDIPHRVLIIRLIRSGWAQNPDERPSFLTCLIDL  
EPVLRFTFDEIAMLEAVILLKRKSLYESRCIYKSRKKADVEQISLNIPL--N--PQEETY  
SGSIQC DALPLRSISPDISRLKSVPKCNILSS--GSFIMENKTDILLT LSKLD-----  
--AI-----V--SC-DDLFP GSCWQEMNGNSGG-LHSLSSQSTDENISVTQSAKLLV  
HPY-S----YSPSSDKSISDASNSASCM LRSPIPSDFVLETIQQNV AHQW IQSK**REEII**  
DQMTEACLNQSLDALLSRFLLMKEDYELISTKPT**RTSKVR**QLLDTSDSQGEEFARI IQK  
LKDNKQLGLQPYPDIV--PNSLRL-----HL

>EOA94323.1\_Anas\_platyrhynchos

-----SDRNHLLKEAEILHKARFSYILPILGICNEPEFLGIVTEYMTNGSLNELLHGK  
DMYPDVPWCLRYRILEY EIALGVNYLHNMNPPLLHHD LKTQNILLDDEFHVKIADFGMSKW  
RVISMSQSRSETSLPEGGTIIYMPPE DYNPSQKTRASVKHDIYSYAIIMWEVMSRKQPFE  
EVINPLQIMYSVSQGGRLDLSEESLSMDIPHRA FVIRLIVSGWAQNPDERPSFLKCLIDL  
EPVLRFTFDEIAMLEAVILLKRKSRYESQCIHKSGKKT DVEKTS LNIPL--N--PQEETG  
SASIHCDALPLRSISPDISRLKSIPKYNILSS--GAA-----SH-----  
-----FMTCFCTDGD SGS-LHSLSCQSVDENLSVTQSAKLFV  
HPY-S----YLPSSDKSISVPSNSSSSV LRTSPIPSDFVLETMQQNV AHQW IQSK**REEII**  
DQMTEACLNQSLDALLSRFLLMKEDYELISTKPT**RTSKVR**QLLDTSDSHGEEFSRI IQK  
LKDNKQLGLQPYPDIV--SNSLRL-----HL

>KFP60755.1\_Cariama\_cristata

-----SDRKHLLKEAEILHKARFSYILPILGICNEPEFLGIVTEYMANGSLNQLLHGK  
DLYPDIPWCLRFRILEYEIALGVNYLHNMNPPLLHDLKTQNILLDDEFHVKIADFGMSKW  
RVISMSQSRSETSLPEGGTIIYMPPELYNPSQKTRASVKHDIYSYAIIMWEVMSRKQPFE  
EVINPLQIMYSVSQGGRLDLSEESLSMDIPHRVVIIRLIGSGWAQNPDERPSFLKCLIDL  
EPVLRFTDEIAMLEAVILLKRSKSLYESRCIYKSGKQADVEQISLNIPL--N--PQEETY  
SGSIQCDALPLRSISPDGARLKSVPKCNILST--GRY-----THGFVKLD-----  
---FC-----L--CQKRDV--FCKFSTLDGNSGG--LHSLSSQSTDENISVTQSAKLLV  
HPY--S---YFPSSDKSISDASNSASCMRSPVPSPDFVLETIQQNVAHQWISK**REEII**  
DQMTEACLNQSLDALLSRFLMKEDYELISTKPT**RTSKVR**QLLDTSDSQGEFARIIVQK  
LKDNKQLGLQPYPDIV--SNSLKL-----HL

>KFQ90254.1\_Phoenicopterus\_ruber

-----SDRNHLLKEAEILHKARFSYILPILGICNEPEFLGIVTEYMTNGSLNQLLHGK  
DVYPDIPWCLRFRILEYEIALGVNYLHNMNPPLLHDLKTQNILLDDEFHVKIADFGMSKW  
RVISMSQSRSETSLPEGGTIIYMPPELYNPSQKTRASVKHDIYSYAIIMWEVMSRKQPFE  
EVINPLQIMYSVSQGGRLDLSEESLSMDIPHRVLIIRLIGSGWAQNPDERPSFLKCLIDL  
EPVLRFTDEIVMLEAVILLKRSKSLYESRCIYKSGKKADVEQISLNIPL--N--PQEEAY  
SASIQCDALPLRSISPDISRLKSVPKCNILSS--GRD-----THDFVKLD-----  
---HR-----L--CQKGDV--FCKLSALDGNSGG--QHSLSSQSTDENISVTQSAKLLV  
HPY--S---YFPSSDKSISEASNSASYMLRSPVPSPDFVLETIQQNVAHQWISK**REEII**  
DQMTEACLNQSLDALLSRFLMKEDYELISTKPT**RTSKVR**QLLDTSDSQGEFARIIIQK  
LKDNKQLGLQPYPDIV--SNSLRL-----HL

>KFQ63971.1\_Pelecanus\_crispus

-----SDRSHLLKEAEILHKARFSYILPILGICNEPEFLGIVTEYMTNGSLNQLLHGK  
DVYPDIPWCLRFRILEYEIALGVNYLHNMNPPLLHDLKTQNILLDDEFHVKIADFGMSKW  
RVISMSQSRNETSLPEGGTIIYMPPELYNPSQKTRASVKHDIYSYAIIMWEVMARKQPFE  
EVINPLQIMYSVSQGGRLDLSEESLSMDIPHRVLVIRLIGSGWAQNPDERPSFLKCLIDL  
EPVLRFTDEIAMLEAVILLKRSKSLYESRCIYKSGKKADVEQIALNIPL--N--PQEETY  
SGSIQCDALPLRSISPDISRLKSVPKCNILSS--ESL-----NLMFLQLN-----  
---FH-----FYSSLLDGNSGG--LHSLSSQSTDENISVTQGAKLLV  
HPY--S---YCPSSDKSISDASNSASCMRSPPTSPDFVLETIQQNVAHQWISK**REEII**  
DQMTEACLNQSLDALLSRFLMKEDYELISTKPT**RTSKVR**QLLDTSDSQGEFARIIIQK  
LKDNKQLGLQPYPDIV--SNSLRL-----HL

>KFM04929.1\_Aptenodytes\_forsteri

-----SDRNHLLKEAEILHKARFSYILPILGICNEPEFLGLVTEYMTNGSLNQLLHGK  
DVYPDIPWCLRFRILEYEIALGVNYLHNLNPPLLHDLKTQNILLDNEFHVKIADFGMSKW  
RVISMSQSRSETSLPEGGTIIYMPPELYNPSQKTRASVKHDIYSYAIIMWEVMSRKQPFE  
EVINPLQIMYSVSQGGRLDLSEESLSMDIPHRVLIIRLIGSGWAQNPDERPSFLKCLIDL  
EPVLRFTDEIAMLEAVILLKRSKSLYESRCIYKSGKKADVEQISLNIPL--N--PQEETY  
SGSIQCDALPLRSISPDISRLKSVPKCNILSS--GSFIMESKTDILLSLPKLD-----  
---AI-----V--SG--ENLFPGSCWQEMNGNSGG--LHSLSSQSTDENISVTQSAKLLV

DPY-S----YFPSSDKSISDASNSASCMLRSSPIPSDFVLETVQQNVAHQWISK**REEII**  
DQMTEACLNQSLDALLSRFLMKEDYELISTKPT**RTSKVR**QLLDTSDSQGEEFARI IQK  
LKDNKQLGLQPYPDIV--SHSLRL-----HL  
>KFQ74688.1\_Phaethon\_lepturus

-----SDRNHLLKEAEILHKARFSYILPILGICNEPEFLGIVTEYMTNGSLNQLLHGK  
DVYPDIPWCLRFRILEYEIALGVNYLHNMNPPLLHDLKTQNILDDEFHVKIADFGMSKW  
RVISMSQSRSETSLPEGGTIIYMPPELYNPSQKTRASVKHDIYSYAIIMWEVMSRKQPFE  
EVINPLQIMYSVSQGGRLDLSEESLSVDIPHRVLIIRLIGSGWAQNPDERPSFSKCLIDL  
EPVLRFTDEIAMLEAVILLKRSKSLYESQCICKSGKKADVEQISLNIPL--N--PQEETIY  
SASIQCDALPLRSISPDISRLKSVPKCINILSS-VSD-----GCILFEHG-----  
---SN-----I--TC-FFF--FFAFFLDGNSGG-LHSLSSQSM DENISVTQS AKLLV  
HPY-S----HFPSSDKSISDASNSASCMLRSSPIPSDFVLETIQQNVAHQWISK**REEII**  
DQMTEACLNQSLDALLSRFLMKEDYELISTKPT**RTSKVR**QLLDTSDSQGEEFARI IQK  
LKDNKQLGLQPYPDIV--SNSRL-----HL  
>KFQ07057.1\_Haliaeetus\_albicilla

-----SDRKHLLKEAEILHKARFSYVLPILGICNEPEFLGIVTEYMTNGSLNQLLHGK  
DVYPDIPWCLRFRILEYEIALGVNYLHNMNPPLLHDLKTQNILDDEFHVKIADFGMSKW  
RVISMSQSRSETSLPEGGTIIYMPPELYNPSQKTRASVKHDIYSYAIIMWEVMSRKQPFE  
EVINPLQIMYSVSQGGRLDLSEESLSMDIPHRVLIIRLIGSGWAQNPDERPSFLKCLIDL  
EPVLRFTDEIAMLEAVILLKRSKSLYESRCICKSGKKADVEQISLNIPL--N--PQEETY  
SGSIQCDALPLRSMSPDVSRLKSVPKCINILSS-ELY-----LT-YIRIL-----  
---FF-----L--SH-KIL--HCRIIYLDGNSGV-LHSLSSQSTDENISVTQS AKLLE  
HPY-S----YFPSSDKSISGASNSASCMLRSSPIPSDFVLETIQQNVAHQWISK**REEII**  
DQMTEACLNQSLDALLSRFLMKEDYELISTKPT**RTSKVR**QLLDTSDSQGEEFARI IQK  
LKDNKQLGLQPYPDIV--SNSRL-----HL  
>KFW05819.1\_Eurypyga\_helias

-----SDRNHLLKEAEILHKARFTYILPILGICNEPEFLGIVTEYMTNGSLNQLLHGR  
DVCPDIPWCLRFRILEYEIALGVNYLHNMNPPLLHDLKTQNILDDEFHVKIADFGMSKW  
RVISMSQSRSETSLPEGGTIIYMPPELYNPSQKTRASVKHDIYSYAIIMWEVMSRKQPFE  
EVINPLQIMYSVSQGGRLDLSEESLSMDIPHRELIIRLIESGWAQDPDERPSFLKCLIDL  
EPVLRFTFEEIAMLEAVILLKRSKSLYESRCIYKSGKRADVKQISLNIPL--N--PQEETC  
SASIQCDALPLRSISPDISRLKSVSRCINILSS-ACF-----FFFFPP-----  
-----PS--LPFLFFKDGNSGG-LQSLSSQSM DENISVTQS AKLLV  
HPY-S----YFPSSDKSISDASNSASCMLRSSPVPSDFVLETIHQNVAHQWISK**REEII**  
DQMTEACLNQSLDALLSRFLMKEDYELISTKPT**RTSKVR**QLLDTSDSQGEEFARI IQK  
LKDNKQLGLQPYPDVV--SNSRL-----HL  
>KFW67401.1\_Pygoscelis\_adeliae

-----SDRNHLLKEAEILHQARFTYILPILGICNEPEFLGLVTEYMTNGSLNQLLHGK  
DVYPDIPWCLRFRILEYEIALGVNYLHNMNPPLLHDLKTQNILDNEFHVKIADFGMSKW  
RVISMSQSRSETSLPEGGTIIYMPPELYNPSQKTRASVKHDIYSYAIIMWEVMSRKQPFE  
EVINPLQIMYSVSQGGRLDLSEESLSMDIPHRVLIIRLIGSGWAQNPDERPSFLKCLIDL

EPVLRTFDEIAMLEAVILLKRSKSLYESRCIYKSGKKADVEQISLNIPL--N--PQEETY  
SGSIQCDALPLRSISPDISRLKSVKPCNILSS-ESL-----DLIFLLN-----  
---F-----HFYYSSLLGQLDGNSGS-LHSLSSQSTDENISVTQSAKLLV  
DPY-S---YLPSSDKSISNASNSASCMRSPSPDFVLETVQQNVAHQWIIQSK**REEII**  
DQMTEACLNQSLDALLSRFLMKEDYELISTKPT**RTSKVR**QLLDTSDSQGEFARIIQK  
LKDNKQLGLQPYPDIV--SHSLRL-----HL  
>KFU96217.1\_Chaetura\_pelagica

-----SDRNHLLKEAEILHKARFSYILPILGICNEPEFLGIVTEYMTNGSLNQLLHGK  
DVYPEIPWCLRFRIEIALGVNYLHNMNPPLHHDLKTQNILDDEFHVKIADFGMSKW  
RVISMSQSRSETSLPEGGTIIYMPEDYNPSQKTRASVKHDIYSYAIIMWEVMSRKRPFE  
EVINPLQIMYSVSQGGRLDLSEESLMDIPHRVLIVRLIASGWAQNPDERPSFLKCLLEL  
EPVLRTFDEIAMLEAVILLKRSKSQYESQCIYKSGKKTQVQISLNIPL--N--PQEETC  
SASIQCDALPLRSISPDVSTFKSVKPCNILSS-GGS-----LFM-P-----  
-----KRDV--FCKISALDGDSEV-LHSLSSQSTDENTSITQSAKLIV  
HPY-S---SFPSSDKCISDASNSASYMLRSPVPSPDFASETIQQNVAHQWIIQSK**REEII**  
DQMTEACLNQSLDALLSRFLMKEDYELISTKPT**RTSKVR**QLLDTSDSQGEFARIIQK  
LKDNKQLGLQPYPDIV--SNSQRL-----HL  
>KFR17723.1\_Opisthocomus\_hoazin

-----SDRNHLLKEAEILHKARFSYILPILGICNEPGFLGIVTEYMTNGSLNQLLHGK  
DVYPDIPWCLRFRIEIALGVNYLHNMNPPLHHDLKTQNILDDEFHVKIADFGMSKW  
RVISMSQSRSETSLPEGGTIIYMPEDYNPSQKTRASVKHDIYSYAVIMWEVMSRKQPFE  
EVINPLQIMYSVSQGGRLDLSGESLMDIPHRALIIRLIGNGWAQNPDERPSFLKCLIDL  
EPVLRTFDEIAMLEAVILLKRSKSLYESQCIYKSGKKAGVEQVSLNIPL--N--SQEETY  
SGSLQCDALPLRSISSGTSRLQSVKPCNILSS-D-----ILLTLPKLD-----  
---AI-----I--SV-ENLFPGRCWQEMNGNSGS-LHSLSSQSTDENISVTQSAKLLM  
HPY-S---YFPSSDKSISDTSNSSPCMLRSPPIPADFALETIQHNVAHQWIIQSK**REEII**  
DQMTEACLNQSLDALLARFLMKEDYELISTKPT**RTSKVR**QLLDTSDSQGEFARIIQK  
LKDNKQLGLQPYPDIV--SNSRL-----HL  
>KFR01688.1\_Nipponia\_nippon

-----SDRNHLLKEAEILHKARFSYILPILGICNEPEFLGIVTEYMTNGSLNQLLHGK  
DVYPDIPWCLRFRLYEIALGVNYLHNMNPPLHHDLKTQNILDDEFHVKIADFGMSKW  
RVISMSQSRSETSLPEGGTIIYMPENYNPSQKTRASVKHDIYSYAIIMWEVMSRKQPFE  
EVINPLQIMYSVSQGGRLDLSEESLMDIPHRVLIIRLIGSGWAQNPDERPSFLKCLIDL  
EPVLRTFDEIAMLEAVILLKRSKSLYESRCIYKSGKKADVEQISLNIPL--N--PQEETY  
SGSIQCDALPLRSISPDISRLKSIPTCNILSS-ESL-----DFIFLLN-----  
---F-----HFYYSSLLGQLDGNSGS--HSLSSQSMDENISVTQGAKLLV  
HPY-S---YCPSPNKSISDASNSASCMRSPSPDFVLETVQQNVAHQWIIQSK**REEII**  
DQMTEACLNQSLDALLSRFLMKEDYELISTKPT**RTSKVR**QLLDTSDSQGEFARIIQK  
LKDNKQLGLQPYPDAV--SNSRL-----HL  
>KFP01549.1\_Calypte\_anna

-----SDRNHLLKEAEILHKARFSYILPILGICNEPEFLGIVTEYMTNGSLNELLHGK

DVYPDIPWCLRFRILEYEIALGVNYLHNMDPPLLHHDLKTQNILLDDEFHVKIADFGMSKW  
RVISMSQSRSETSLPEGGTIIYMPPEDYNPSQKTRASVKHDIYSYAIIMWEVMSRKQPFE  
EVTNPLQIMYSVSQGGRLDLSEESLSMDIPHRALVRLIGSGWAQNPDERPSFLKCLLEL  
EPVLRFTFDEIAMLEAVLLKRSKSLYESRCIYKIGKKADVQQISLNIPL--N--PQEETC  
SASIQCDAPLRSISPVISRFKSVSKSNILSS-SRD-----NV-YTRFL-----  
---FF-----L--SQ-EIL--HYRISCLDGNSEG-LHSLSNQSTDENTSVTQSARLLG  
HPY-S----SLPSSDKCISNASNSASCGLPSSPLPSDFLLETIQQNAHQWIQSK**REEII**  
DQMTEACLNQSLDALLSRFLMKEDYELISTKPT**RTSKVR**QLLDTSDSQGEEFARIIQK  
LKDNKQLGLQPYPDVI--PNSLKL-----HL  
>KFP88042.1\_Acanthisitta\_chloris

-----CL-  
-FACFLLSDRDHLLKEAEILHKARFSYILPILGICNEPEFLGIVTEYMTNGSLNQLLHGK  
DVYPDIPWCLRFRILEYEIALGVNYLHNMPPLLHHDLKTQNILLDDEFHVKIADFGMSKW  
RVISMSQSRSESSLPEGGTIIYMPPEDYNPSQKTRASVKHDIYSYAVIMWEVMSRKQPFE  
EVINPLQIMYSVSQGGRLDLSEESLPIDIPHRMLVIRLMESGWAQNPDERPSFLKCLIDL  
EPVLRFTFDEIAMLEAVILLKRSKSLYESRCIYKSGKKANVDQISLNIPL--N--PPKET  
SGSIQCDALPLRSISPDISKIKSVPCNILSP-GEI-----LLILYKFKLLWLTP  
VVTFHFLSRKLGL--SQKIDV--LCKLSALDGSSVG-LHSLSSQSTDENISVTQSAKLLV  
HPY-S----NAPSSDKSISDASNSASCMLQSSPIPADFILETIQQNVAHQWIQSK**REEII**  
DQMTEACLNQSLDALLSRYLKMKEDYELISTKPT**RTSKVR**QLLDTSDSQGEEFARIIQK  
LKDNKQLGLQPYPDIV--SNSQRL-----HL  
>KF087475.1\_Buceros\_rhinoceros\_silvestris

-----SDRNHLLKEAEILHKARFSYVLPILGICNEPEFLGIVTEYMPNGSLNQLLHGK  
DVYPDISWCLRFRILEYEIALGVNYLHNMPPLLHHDLKTQNILLGDEFHVKIADFGMSKW  
RVISVSQSRSETSLPEGGTIIYMPPEDYNPSQKTRASVKHDIYSYAVIMWEVMSRKQPFE  
EVINPLQIMYSVSQGGRLDLSEESLSMDIPHRLLIIRLIGSGWAQNPDERPSFLKCLIDL  
EPVLRFTFDEITMLEAVIRLKRKSLYESQHINKSGKKADVEQITLNIPL--N--LQEETY  
LGSIQCDALPLRSISPEISRPKSVSKCNILSS-DVL-----LT-LPKLH-----  
---AI-----V--SA--RS--FFSLFFKDGSSSEG-PHSLSSKSTDENISVTQSAKLLV  
HPY-G----YFPSSDKSISDGSNSASCMLRSSPTPSDFVLETLQQNVAHQWIQSR**REEII**  
DQMTEACLNQSLDALLARFLMKEDYELISTKPT**RTSKVR**QLLDTSDSQGEEFARIIQK  
LKDNKQLGLQPYPDII--SNSLRL-----HL  
>KFP33539.1\_Colius\_striatus

-----SDREHLLKEAEILHKARFSYILPILGICNEPEFLGIVTEYMTNGSLNQLLHGK  
DIYPDVPWCLRFRILEYEIALGVNYLHNMPPLLHHDLKTQNILLDDEFHVKIADFGMSKW  
RIISMSRSRSETSLPEGGTIIYMPPEDYNPSQKTRASVKHDIYSYAILMWEVMSRKQPFE  
EVINPLQIMYSVSQGGRLDLSEKSLSDIPHRVLIIRLIGSGWAQNPDERPSFLKCLIDL  
EPALRTFDEIAMLEAVTLLKRSTLYESPCIYKSGKNTDVEQISLNIPL--S--PQEETC  
SGSVQCDALPLRSISPDMSRVKSICKCNILSS-ANW-----VFFC-----  
-----FFFIFEDVNSGC-LHSLSSQSMDENISVTQRAKLLG  
HPY-G----CFHSSDKSSSDASSAPCRLQSSPIPSDFVLETLQQNVAHQWIQSK**REEII**  
DQMTEACLNQSLDALLSRFLMKEDYELISTKPT**RTSKVR**QLLDTSDSQGEEFARIIQK  
LKDNKQLGLQPYPDIV--SNSLTL-----HL

>KF057232.1\_Corvus\_brachyrhynchos

-----SDRNHLLKEAEVLHKARFSYILPILGICNEPEFLGIVTEYMTNGSLNQLLHGK  
DIYDPDPWCLRFRILEYEIALGVNYLHNMNPPLLHDLKTQNILLDDEFHVKIADFGMSKW  
RVISMSQSRSESSLPEGGTIIYMPPELYNPTQKTRASVKHDIYSYAVIMWEVMSRKQPFE  
EVINPLQIMYSVSQGGRLDLSEGLSMDIPHRGLIIRLMESGWAQNPDERPSFLKCLIDL  
EPVLRFTFDEIAMLEAVILLRRSKSVYESQCIYKSGKKANMEQISLNIPL--N--PDKPAY  
SSSIQCDALPLRSISPDISKLKSIPQCNISS-GEI-----LLIFRKL-----  
---HS-----M--SE-RNV--FCKLCALDGNSSG-LHSLSSQSTDGNLSVTQSAKVLV  
HPY-S---TVLSSDKSISDASSSSSVLRSSPIPSDFVLETVQQNVAHQWISK**REEII**  
DQMTEACLNQSLDALLSRYLLMKEDYELISTKPT**RTSKVR**QLLDTSDSQGEFARIIVQK  
LKDNKQLGLQPYPDIV--SNSQRL-----HL

>XP\_010403308.1\_Corvus\_cornix

MSGGDG--GGGRAGALSYALPSIPSSKLPDLRFISRGAYGTVSAARHADWRVPVALKCL-  
-QGPLDSDRNHLLKEAEVLHKARFSYILPILGICNEPEFLGIVTEYMTNGSLNQLLHGK  
DIYDPDPWCLRFRILEYEIALGVNYLHNMNPPLLHDLKTQNILLDDEFHVKIADFGMSKW  
RVISMSQSRSESSLPEGGTIIYMPPELYNPTQKTRASVKHDIYSYAVIMWEVMSRKQPFE  
EVINPLQIMYSVSQGGRLDLSEGLSMDIPHRGLIIRLMESGWAQNPDERPSFLKCLIDL  
EPVLRFTFDEIAMLEAVILLRRSKSVYESQCIYKSGKKANMEQISLNIPL--N--PDKPAY  
SSSIQCDALPLRSISPDISKLKSIPQCNISS-----  
-----DGNSGC-LHSLSSQSTDGNLSVTQSAKVLV  
HPY-S---TVLSSDKSISDASSSSSVLRSSPIPSDFVLETVQQNVAHQWISK**REEII**  
DQMTEACLNQSLDALLSRYLLMKEDYELISTKPT**RTSKVR**QLLDTSDSQGEFARIIVQK  
LKDNKQLGLQPYPDIV--SNSQRL-----HL

>KF013799.1\_Balearica\_regulorum

-----SDRNHLLKEAEILHKARFSYILPILGICNEPEFLGIVTEYMTNGSLNQLLHGK  
DVYPDPWCLRFRILEYEIALGVNYLHNMNPPLLHDLKTQNILLDDEFHVKIADFGMSKW  
RVISMSQSRSETSLPEGGTIIYMPPELYNPSQKTRASVKHDIYSYAIIMWEVMSRKQPFE  
EVINPLQIMYSVSQGGRLDLSEESLSMDIPHRVLIIVRLIGSGWAQNPDERPSFLKCLIDL  
EPVLRFTFDEIAMMEAVILLKRKSLYESRCIYKSGKKADVEQISLNIPL--N--PQEEAY  
SGSIQCDALPLRSISPDSRLKSVPKCNILSS-DEI-----DFTAMKEG-----  
---I-----K--KC-AEVLQNCRYSGRDGNSGG-LHSLSTQSMDENISVTQSAKLLV  
HPY-S---YFPSSDKSISDASNSASCMLRSSPIPSDFVLETIQQNIAHQWISK**REEII**  
DQMTEACLNQSLDALLSRFLMKEDYELISTKPT**RTSKVR**QLLDTSDSQGEFARIIVQK  
LKDNKQLGLQPYPDIV--SNSRL-----HL

>KFV81187.1\_Struthio\_camelus\_australis

-----SDRNHLLKEAEILHKARFSYILPILGICNEPEFLGIVTEYMTNGSLNQLLHGK  
DVYPDPWCLRFRILEYEIALGVNYLHNMNPPLLHDLKTQNILLDDEFHVKIADFGLSKW  
RVVMSQSRSETSLPEGGTIIYMPPELYNPSQKSRASVKHDIYSYAIIMWEVMTRKQPFE  
EVINPLQIMYSVSQGGRLDLSEKESLSMDIPHRALIIRLIASGWAQNPDERPSFLKCLIDL  
EPVLRFTFDEIAMLEAVILLKRKLLYESQCIHKSGKKTHADQTSNIPLNLN--PQEEH  
SVSIQYDALPLRSIPPDVSTFKSAPKYNILSS-GI-----LLTLPKLD-----  
---AV-----V--PA-ENLFLGGCWQEMNGNSGD-LHSSSSQSMDENFSVTQSAKLLV

HPY-S----SSASSDKSISSASN-----LRSSPIPSDFVLETIQHNVAHQWIIQSK**REEII**  
DQMTEACLNQSLDALLSRFLMKEDYELISTKPT**RTSKVR**QLLDTSDSQGEEFARII IQK  
LKDNKQLGLQPYPDIV--SNSLRL-----HL  
>KGL77642.1\_Tinamus\_guttatus

-----SDRNHLLKEAEILHKARFSYILPILGICNEPEFLGIVTEYMTNGSLNQLLHGK  
DVYPDIPWCLRFRILEYEIALGVNYLHNMNPPLLHDLKTQNILLDDEFHVKIADFGLSKW  
RVVMSQSRSEMSLPEGGTIIYMPPENYTPSQKTRASVKHDIYSYAIIMWEVMARKQPFE  
EVINPLQIMYSVSQGGRLDLSEESLSDIPHRALVTRLIASGWAQNPDERPSFLKCLIDL  
EPVLRFTDEIAMLEAVILLKRSKSLYESRCIHKSGKKTADQTFLNIPL--NPNPQEEMH  
SASIQYDGLPLQSIPPDVSTYKSVPKYNILSS-GRD-----IHDFIS-----  
-----INSFFLDGNSGD-LHSLSNQSMDENISVTQSAKLLV  
HPY-TDSFTCSPSSDRSISSASNSAPCMLRSSPTPDFVLEAMQPNVAHQWIIQSK**REEII**  
DQMTEACLNQSLDALLSRFLMKEDYELISTKPT**RTSKVR**QLLDTSDSQGEEFARII IQK  
LKDNKQLGLQPYPDIV--PTSLRL-----HL  
>KFZ59450.1\_Podiceps\_cristatus

-----FQIADFGMSKW  
RVISMSQSRSETSLPEGGTIIYMPPEDYNPSQKTRASVKHDIYSYAIIMWEVMSRKQPFE  
EVINPLQIMYSVSQGGRLDLSEESLSMDIPHRVLIIRLIGSGWAQNPDERPSFLKCLIDL  
EPVLRFTDEIVMLEAVILLKRSKSLYESRCLYKSGKKADAEQITLNIPL--N--PQEETY  
SASIQCDALPLRSISPDISSIKSVPKCNILSS-DLM-----FC-AAKFS-----  
---LL-----LFQSS-RST--RFFLSNLNGSSGG-QHSLSSQSTDENISVTQSAKLLV  
HPY-S----YFSSSDKNISNASNSASYMLRSSPIPSDFVLETIQNVAHQWIIQSK**REEII**  
DQMTEACLNQSLDALLSRFLMKEDYELISTKPT**RTSKVR**QLLDTSDSQGEEFARII IQK  
LKDNKQLGLQPYPDIV--SNSLRL-----HL  
>KFQ47898.1\_Nestor\_notabilis

-----FQIADFGMSKW  
RVISMSQSRSETSLPEGGTIIYMPPEDYNPSQKTRASVKHDIYSYAIIMWEVMSRKQPFE  
EVINPLQIMYSVSQGGRLDLSEESLSMGIPHRVLIIVRLIESGWAQNPDERPSFLKCLIDL  
EPVLRFTDEIAMLEAVILLKRSKSLYESQSIYKSGKQADTEQISLNIPV--N--THEETY  
SGSIQCDALPLRSISPDISRLKSVPKCNIFSS-GRD-----THNFVNTA-----  
---G-----SF-VVSYFLFDGNSGG-LQSLSCQSTDENISVTQSARLLV  
HPY-S----CFPSSDKSNSDASNSAPCMLRSSPIPSDFVLETVQQNIAHQWIIQSK**REEII**  
DQMTEACLNQSLDALLSRFLMKEDYELISTKPT**RTSKVR**QLLDTSDSQGEEFARII IQK  
LKDNKQLGLQPYPDIV--PNSLRL-----HL  
>KFV95703.1\_Fulmarus\_glacialis

-----FQIADFGMSKW  
RVISMSQSRSETSLPEGGTIIYMPPEDYNPSQKTRASVKHDIYSYAIIMWEVMSRKQPFE  
EVINPLQIMYSVSQGGRLDLSEESLSMDIPHRVLIIGLIGSGWAQNPDERPSFLKCLIDL

EPVLRTFDEIAMLEAVILLKRSKSLYESRCIYKSEKKANVEQISLNIPL--N--PQEETC  
SASIQC DALPLRSISPDISRLKSVPKCNILSS-ESL-----DLIFLLN-----  
---F-----HFCYSSLLGQLDGN SGD-LHSHSSQSTDENISVTQSAKLLV  
HPY-S----YFPSSDQSDASNSASCMLRSSPIPSDFVLETIQQNVAHQWISK**REEII**  
DQMTEACLNQSLDALLSRFLMKEDYELISTKPT**RTSKVR**QLLDTSDSQGEEFARI IQK  
LKDNKQLGLRPYPDIV--SNSLKL-----HV
