# Supplementary material for: Structural and Evolutionary Adaptation of NOD-Like Receptors in Birds
Source: Biomed Res Int. 2021 Apr 29;2021:5546170. doi: 10.1155/2021/5546170 (PMC8105094; doi:10.1155/2021/5546170)
Supplement: Supplementary Materials — S1: RIP2 alignment. S2: primers and chicken sequences and ancestral sequences. S3: avian sequences accession number. Supplementary Table 1: sites found to be under positive selection. [file 5546170.f1.zip]

Archive with 4 entries (4 files):
- S1 RIP2 alignment.pdf
- S2 Primers and chicken sequences and ancestral sequences.pdf
- S3 avian sequences accession number.pdf
- Table 1_revised.docx
